# Supplementary material
Source: Springer Nature journal article supplement (https://www.springermedizin.de/resource/supplementary/12893_2010_186_MOESM1_ESM.pdf/9511822)

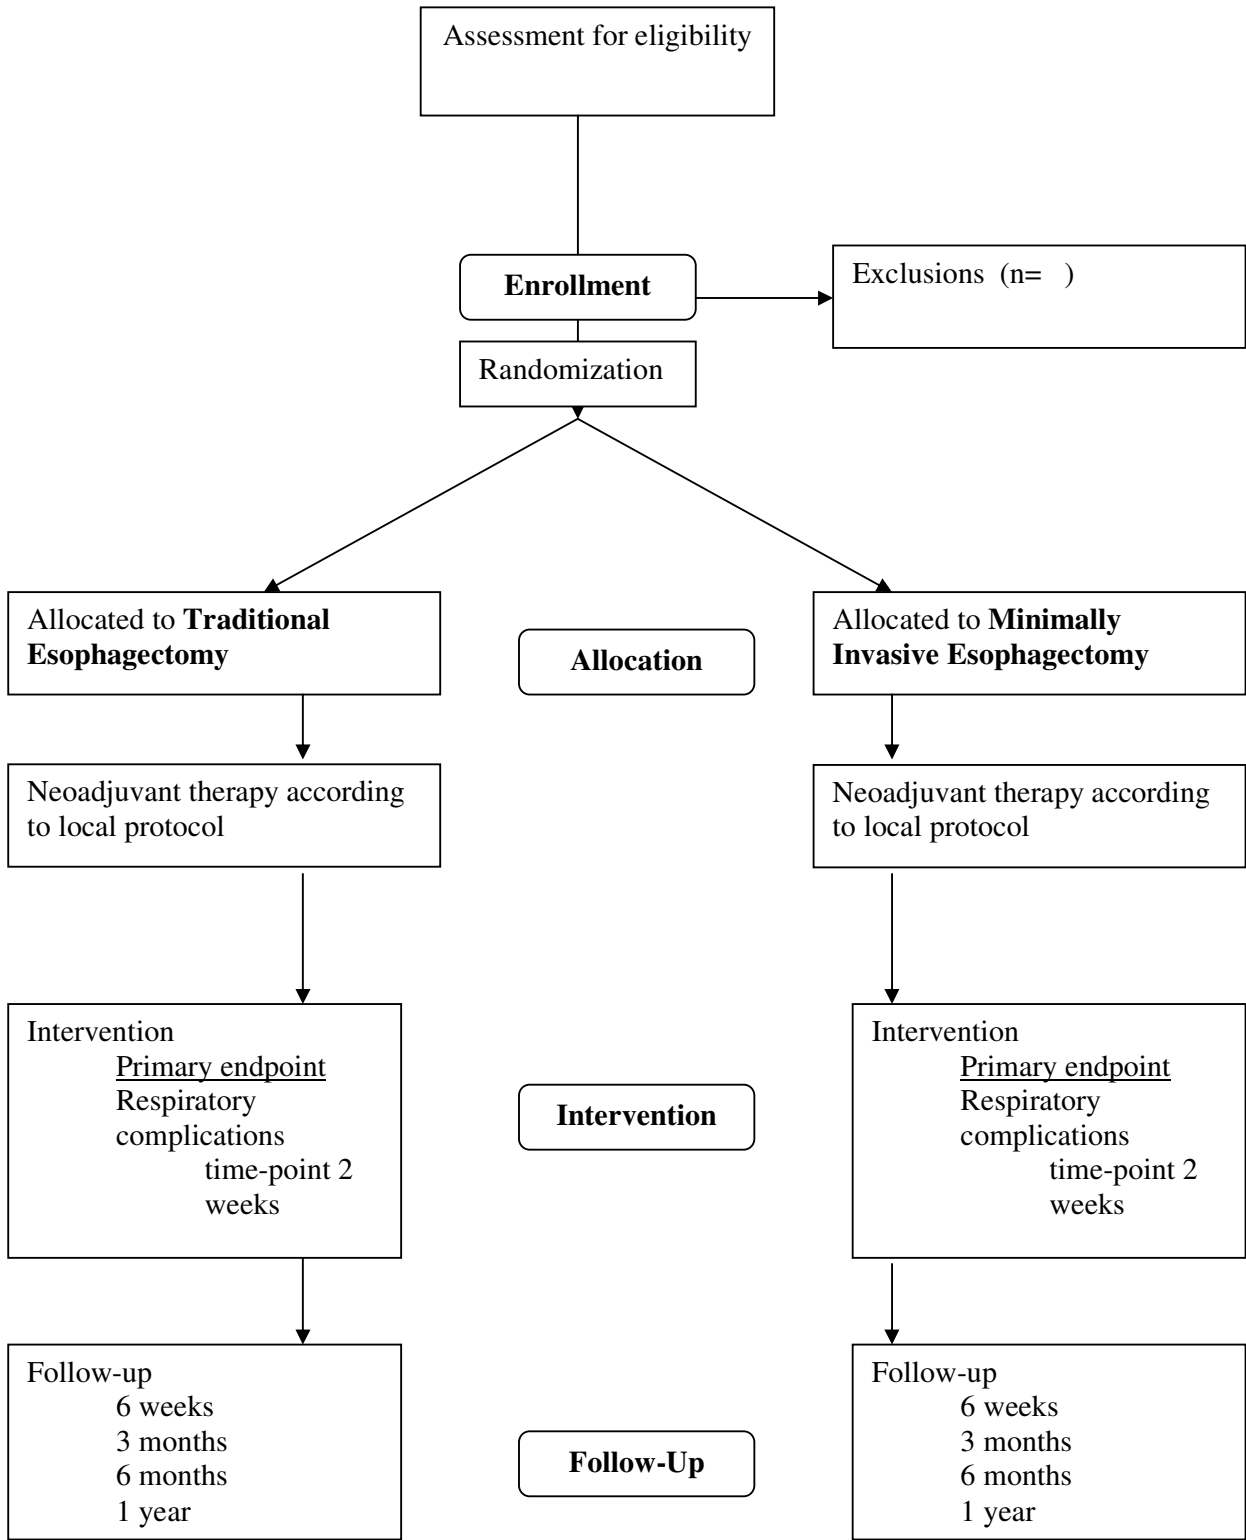

Supplement: MOESM1 [file 9511822]
